# Supplementary material for: Association of Psychiatric Disorders With Incidence of SARS-CoV-2 Breakthrough Infection Among Vaccinated Adults
Source: PubMed Central journal article supplement (PMC9011123; doi:10.1001/jamanetworkopen.2022.7287), 2022-04-14
Supplement: jamanetwopen-e227287-s001.pdf [file jamanetwopen-e227287-s001.pdf]

## Supplementary Online Content

Nishimi K, Neylan TC, Bertenthal D, Seal KH, O'Donovan A. Association of psychiatric disorders with incidence of SARS-CoV-2 breakthrough infection among vaccinated adults. *JAMA Netw Open*. 2022;5(4):e227287.

doi:10.1001/jamanetworkopen.2022.7287

**eTable 1.** *International Classification of Diseases, Ninth Revision, Clinical Modification (ICD-9-CM) and ICD-10-CM Codes Used to Define Psychiatric Disorders*

**eTable 2.** *Associations Between Any Psychiatric Disorder and Breakthrough SARS-CoV-2 Infections Among Fully Vaccinated VA Patients at Least 30 Days Postvaccination (n = 241,705), in the Full Sample and Age-Stratified*

**eTable 3.** *Associations Between Psychiatric Disorders and Breakthrough SARS-CoV-2 Infections Among Fully Vaccinated VA Patients Excluding Those With Booster Vaccination (n = 257,171), in the Full Sample and Age-Stratified*

This supplementary material has been provided by the authors to give readers additional information about their work.

**eTable 1. International Classification of Diseases, Ninth Revision, Clinical Modification (ICD-9-CM) and ICD-10-CM Codes Used to Define Psychiatric Disorders**

| Psychiatric Disorder          | ICD-9-CM                                                                                                                                                                                                                                                                                                                                                                                                                                                                                                                                        | ICD-10-CM Codes                                                                                                                                                                                                                                                                                                                                                                                                                                                                                                                                                                                                                                                                                                                                                                                                                                                                                                                                                                                                                                                                               |
|-------------------------------|-------------------------------------------------------------------------------------------------------------------------------------------------------------------------------------------------------------------------------------------------------------------------------------------------------------------------------------------------------------------------------------------------------------------------------------------------------------------------------------------------------------------------------------------------|-----------------------------------------------------------------------------------------------------------------------------------------------------------------------------------------------------------------------------------------------------------------------------------------------------------------------------------------------------------------------------------------------------------------------------------------------------------------------------------------------------------------------------------------------------------------------------------------------------------------------------------------------------------------------------------------------------------------------------------------------------------------------------------------------------------------------------------------------------------------------------------------------------------------------------------------------------------------------------------------------------------------------------------------------------------------------------------------------|
| Posttraumatic Stress Disorder | 309.81 Posttraumatic Stress Disorder                                                                                                                                                                                                                                                                                                                                                                                                                                                                                                            | F43.1 Posttraumatic Stress Disorder                                                                                                                                                                                                                                                                                                                                                                                                                                                                                                                                                                                                                                                                                                                                                                                                                                                                                                                                                                                                                                                           |
| Major Depressive Disorder     | 293.83 Mood disorder in conditions classified elsewhere<br>296.20-296.25 Major depressive affective disorder, single episode<br>296.30-296.35 Major depressive affective disorder, recurrent episode<br>296.82 Atypical depressive disorder<br>300.4 Dysthymic disorder<br>311 Depressive disorder, not elsewhere classified                                                                                                                                                                                                                    | F32.0-4 Major depressive disorder, single episode<br>F33.0-3 Major depressive disorder, recurrent<br>F33.8 Other recurrent depressive disorders<br>F33.9 Major depressive disorder, recurrent, unspecified<br>F34.1 Dysthymic disorder<br>F34.81 Disruptive mood dysregulation disorder<br>F34.89 Other specified persistent mood disorders<br>F34.9 Persistent mood [affective] disorder, unspecified<br>F39 Unspecified mood [affective] disorder                                                                                                                                                                                                                                                                                                                                                                                                                                                                                                                                                                                                                                           |
| Anxiety Disorder              | 300.00 Anxiety state, unspecified<br>300.01 Panic disorder without agoraphobia<br>300.02 Generalized anxiety disorder<br>300.09 Other anxiety states<br>300.20 Phobia, unspecified<br>300.21 Agoraphobia with panic disorder<br>300.22 Agoraphobia without mention of panic attacks<br>300.23 Social phobia<br>300.29 Other isolated or specific phobias<br>300.30 Obsessive-compulsive disorders<br>300.70 Hypochondriasis<br>300.81 Somatization disorder<br>300.82 Undifferentiated somatoform disorder<br>300.89 Other somatoform disorders | F40.00 Agoraphobia, unspecified<br>F40.01 Agoraphobia with panic disorder<br>F40.02 Agoraphobia without panic disorder<br>F40.10 Social phobia, unspecified<br>F40.11 Social phobia, generalized<br>F40.210 Arachnophobia<br>F40.218 Other animal type phobia<br>F40.220 Fear of thunderstorms<br>F40.228 Other natural environment type phobia<br>F40.230 Fear of blood<br>F40.231 Fear of injections and transfusions<br>F40.232 Fear of other medical care<br>F40.233 Fear of injury<br>F40.240 Claustrophobia<br>F40.241 Acrophobia<br>F40.242 Fear of bridges<br>F40.243 Fear of flying<br>F40.248 Other situational type phobia<br>F40.290 Androphobia<br>F40.291 Gynephobia<br>F40.298 Other specified phobia<br>F40.8 Other phobic anxiety disorders<br>F40.9 Phobic anxiety disorder, unspecified<br>F41.0 Panic disorder without agoraphobia<br>F41.1 Generalized anxiety disorder<br>F41.3 Other mixed anxiety disorders<br>F41.8 Other specified anxiety disorders<br>F41.9 Anxiety disorder, unspecified<br>F42.2 Mixed obsessional thoughts and acts<br>F42.3 Hoarding disorder |

|                        |                                                                                                                                                                                                                                                                                                                                                                                                                                                                                                                                                                                                                                                                                                                                                                                                                                                                                                                       |                                                                                                                                                                                                                                                                                                                                                                                                                                                                                                                                                                                                                                                                                                                                                                                                                                                                                                                                                                                                                                                                                                             |
|------------------------|-----------------------------------------------------------------------------------------------------------------------------------------------------------------------------------------------------------------------------------------------------------------------------------------------------------------------------------------------------------------------------------------------------------------------------------------------------------------------------------------------------------------------------------------------------------------------------------------------------------------------------------------------------------------------------------------------------------------------------------------------------------------------------------------------------------------------------------------------------------------------------------------------------------------------|-------------------------------------------------------------------------------------------------------------------------------------------------------------------------------------------------------------------------------------------------------------------------------------------------------------------------------------------------------------------------------------------------------------------------------------------------------------------------------------------------------------------------------------------------------------------------------------------------------------------------------------------------------------------------------------------------------------------------------------------------------------------------------------------------------------------------------------------------------------------------------------------------------------------------------------------------------------------------------------------------------------------------------------------------------------------------------------------------------------|
|                        |                                                                                                                                                                                                                                                                                                                                                                                                                                                                                                                                                                                                                                                                                                                                                                                                                                                                                                                       | <p>F42.4 Excoriation (skin-picking) disorder</p> <p>F42.8 Other obsessive-compulsive disorder</p> <p>F42.9 Obsessive-compulsive disorder, unspecified</p> <p>F45.0 Somatization disorder</p> <p>F45.1 Undifferentiated somatoform disorder</p> <p>F45.20 Hypochondriacal disorder, unspecified</p> <p>F45.21 Hypochondriasis</p> <p>F45.22 Body dysmorphic disorder</p> <p>F45.29 Other hypochondriacal disorders</p> <p>F45.8 Other somatoform disorders</p> <p>F45.9 Somatoform disorder, unspecified</p> <p>F63.3 Trichotillomania</p>                                                                                                                                                                                                                                                                                                                                                                                                                                                                                                                                                                   |
| Substance Use Disorder | <p>304.00-02 Opioid type dependence</p> <p>304.10-12 Sedative, hypnotic or anxiolytic dependence</p> <p>304.20-22 Cocaine dependence</p> <p>304.30-32 Cannabis dependence</p> <p>304.40-42 Amphetamine and other psychostimulant dependence</p> <p>304.50-52 Hallucinogen dependence</p> <p>304.60-62 Other specified drug dependence</p> <p>304.70-72 Combinations of opioid type drug with any other drug dependence</p> <p>304.80-82 Combinations of drug dependence excluding opioid type drug</p> <p>304.90-92 Unspecified drug dependence</p> <p>305.20-22 Cannabis abuse</p> <p>305.30-32 Hallucinogen abuse</p> <p>305.40-42 Sedative, hypnotic or anxiolytic abuse</p> <p>305.50-52 Opioid abuse</p> <p>305.60-62 Cocaine abuse</p> <p>305.70-72 Amphetamine or related acting sympathomimetic abuse</p> <p>305.80-82 Antidepressant type abuse</p> <p>305.90-02 Other, mixed, or unspecified drug abuse</p> | <p>F11.1 Opioid abuse</p> <p>F11.2 Opioid dependence (excluding F11.21 Opioid dependence, in remission)</p> <p>F12.1 Cannabis abuse</p> <p>F12.2 Cannabis dependence (excluding F12.21 Cannabis dependence, in remission)</p> <p>F13.1 Sedative, hypnotic or anxiolytic abuse</p> <p>F13.2 Sedative, hypnotic or anxiolytic dependence (excluding F13.21 Sedative, hypnotic or anxiolytic dependence, in remission)</p> <p>F14.1 Cocaine abuse</p> <p>F14.2 Cocaine dependence (excluding F14.21 Cocaine dependence, in remission)</p> <p>F15.1 Other stimulant abuse</p> <p>F15.2 Other stimulant dependence (excluding F15.21 Other stimulant dependence, in remission)</p> <p>F16.1 Hallucinogen abuse</p> <p>F16.2 Hallucinogen dependence (excluding F16.21 Hallucinogen dependence, in remission)</p> <p>F18.1 Inhalant abuse</p> <p>F18.2 Inhalant dependence (excluding F18.21 Inhalant dependence, in remission)</p> <p>F19.1 Other psychoactive substance abuse</p> <p>F19.2 Other psychoactive substance dependence (excluding F19.21 Other psychoactive substance dependence, in remission)</p> |
| Alcohol Use Disorder   | <p>303.00-02 Acute alcoholic intoxication in alcoholism</p> <p>303.90-92 Other and unspecified alcohol dependence</p> <p>305.00-02 Alcohol abuse</p>                                                                                                                                                                                                                                                                                                                                                                                                                                                                                                                                                                                                                                                                                                                                                                  | <p>F10.1 Alcohol abuse</p> <p>F10.2 Alcohol dependence (excluding F10.21 Alcohol dependence, in remission)</p>                                                                                                                                                                                                                                                                                                                                                                                                                                                                                                                                                                                                                                                                                                                                                                                                                                                                                                                                                                                              |
| Bipolar Disorder       | <p>296.00-05 Bipolar I disorder, single manic episode</p>                                                                                                                                                                                                                                                                                                                                                                                                                                                                                                                                                                                                                                                                                                                                                                                                                                                             | <p>F30 Manic episode (excluding F30.4 Manic episode in full remission)</p>                                                                                                                                                                                                                                                                                                                                                                                                                                                                                                                                                                                                                                                                                                                                                                                                                                                                                                                                                                                                                                  |

|                                          |                                                                                                                                                                                                                                                                                                                                                                                                                                                                                                                                                                                                                                                                                                                                                                                                                                                                                                                                                                                                             |                                                                                                                                                                                                                                                                                                                                                                                                                                                                                                                                                                                                                                                                                                                                                                                                                                                         |
|------------------------------------------|-------------------------------------------------------------------------------------------------------------------------------------------------------------------------------------------------------------------------------------------------------------------------------------------------------------------------------------------------------------------------------------------------------------------------------------------------------------------------------------------------------------------------------------------------------------------------------------------------------------------------------------------------------------------------------------------------------------------------------------------------------------------------------------------------------------------------------------------------------------------------------------------------------------------------------------------------------------------------------------------------------------|---------------------------------------------------------------------------------------------------------------------------------------------------------------------------------------------------------------------------------------------------------------------------------------------------------------------------------------------------------------------------------------------------------------------------------------------------------------------------------------------------------------------------------------------------------------------------------------------------------------------------------------------------------------------------------------------------------------------------------------------------------------------------------------------------------------------------------------------------------|
|                                          | <p>296.10-15 Manic affective disorder, recurrent episode</p> <p>296.40-45 Bipolar I disorder, most recent episode (or current) manic</p> <p>296.50-55 Bipolar I disorder, most recent episode (or current) depressed</p> <p>296.60-65 Bipolar I disorder, most recent episode (or current) mixed</p> <p>296.70 Bipolar I disorder, most recent episode (or current) unspecified</p> <p>296.80 Bipolar disorder, unspecified</p> <p>296-81 Atypical manic disorder</p> <p>296.89 Other bipolar disorders</p> <p>301.13 Cyclothymic disorder</p>                                                                                                                                                                                                                                                                                                                                                                                                                                                              | <p>F31 Bipolar disorder (excluding F31.7 Bipolar disorder, currently in remission)</p> <p>F34 Cyclothymic disorder</p>                                                                                                                                                                                                                                                                                                                                                                                                                                                                                                                                                                                                                                                                                                                                  |
| Psychotic Disorder                       | <p>295.00-04 Simple type schizophrenia</p> <p>295.10-14 Disorganized type schizophrenia</p> <p>295.20-24 Catatonic type schizophrenia</p> <p>295.30-34 Paranoid type schizophrenia</p> <p>295.40-44 Schizophreniform disorder</p> <p>295.50-54 Latent schizophrenia</p> <p>295.60-64 Schizophrenic disorders, residual type</p> <p>295.70-74 Schizoaffective disorder</p> <p>295.80-84 Other specified types of schizophrenia</p> <p>295.90-94 Unspecified schizophrenia</p> <p>297.00 Paranoid state, simple</p> <p>297.10 Delusional disorder</p> <p>297.20 Paraphrenia</p> <p>297.30 Shared psychotic disorder</p> <p>297.80 Other specified paranoid states</p> <p>297.90 Unspecified paranoid state</p> <p>298.00 Depressive type psychosis</p> <p>298.10 Excitatory type psychosis</p> <p>298.20 Reactive confusion</p> <p>298.30 Acute paranoid reaction</p> <p>298.40 Psychogenic paranoid psychosis</p> <p>298.80 Other and unspecified reactive psychosis</p> <p>298.90 Unspecified psychosis</p> | <p>F20.0 Paranoid schizophrenia</p> <p>F20.1 Disorganized schizophrenia</p> <p>F20.2 Catatonic schizophrenia</p> <p>F20.3 Undifferentiated schizophrenia</p> <p>F20.5 Residual schizophrenia</p> <p>F20.81 Schizophreniform disorder</p> <p>F20.89 Other schizophrenia</p> <p>F20.9 Schizophrenia, unspecified</p> <p>F21 Schizotypal disorder</p> <p>F22 Delusional disorders</p> <p>F23 Brief psychotic disorder</p> <p>F24 Shared psychotic disorder</p> <p>F25.0 Schizoaffective disorder, bipolar type</p> <p>F25.1 Schizoaffective disorder, depressive type</p> <p>F25.8 Other schizoaffective disorders</p> <p>F25.9 Schizoaffective disorder, unspecified</p> <p>F28 Other psych disorder not due to a substance or known physiological condition</p> <p>F29 Unspecified psychosis not due to a substance or known physiological condition</p> |
| Eating Disorder                          | <p>307.10 Anorexia nervosa</p> <p>307.50 Eating disorder, unspecified</p> <p>307.51 Bulimia nervosa</p>                                                                                                                                                                                                                                                                                                                                                                                                                                                                                                                                                                                                                                                                                                                                                                                                                                                                                                     | <p>F50.00-02 Anorexia nervosa</p> <p>F50.2 Bulimia nervosa</p> <p>F50.81 Binge eating disorder</p> <p>F50.89 Other specified eating disorder</p> <p>F50.9 Eating disorder, unspecified</p>                                                                                                                                                                                                                                                                                                                                                                                                                                                                                                                                                                                                                                                              |
| Attention-Deficit Hyperactivity Disorder | <p>314.00 Attention deficit disorder without mention of hyperactivity</p> <p>314.01 Attention deficit disorder with hyperactivity</p>                                                                                                                                                                                                                                                                                                                                                                                                                                                                                                                                                                                                                                                                                                                                                                                                                                                                       | <p>F90 Attention-deficit hyperactivity disorder</p>                                                                                                                                                                                                                                                                                                                                                                                                                                                                                                                                                                                                                                                                                                                                                                                                     |
| Dissociative Disorder                    | <p>300.11 Conversion disorder</p> <p>300.12 Dissociative amnesia</p> <p>300.13 Dissociative fugue</p> <p>300.14 Dissociative identity disorder</p> <p>300.15 Dissociative disorder or reaction, unspecified</p>                                                                                                                                                                                                                                                                                                                                                                                                                                                                                                                                                                                                                                                                                                                                                                                             | <p>F44.0 Dissociative amnesia</p> <p>F44.1 Dissociative fugue</p> <p>F44.2 Dissociative stupor</p> <p>F44.4 Conversion disorder with motor symptom or deficit</p>                                                                                                                                                                                                                                                                                                                                                                                                                                                                                                                                                                                                                                                                                       |

|                     |                                                                                                                                                                                                                                                                                                                                                                                                                                                                                                                                                                                                                                                                                                                                                                                                                                                                                               |                                                                                                                                                                                                                                                                                                                                                                                                                             |
|---------------------|-----------------------------------------------------------------------------------------------------------------------------------------------------------------------------------------------------------------------------------------------------------------------------------------------------------------------------------------------------------------------------------------------------------------------------------------------------------------------------------------------------------------------------------------------------------------------------------------------------------------------------------------------------------------------------------------------------------------------------------------------------------------------------------------------------------------------------------------------------------------------------------------------|-----------------------------------------------------------------------------------------------------------------------------------------------------------------------------------------------------------------------------------------------------------------------------------------------------------------------------------------------------------------------------------------------------------------------------|
|                     | <p>300.16 Factitious disorder with predominantly psychological signs and symptoms</p> <p>300.19 Other and unspecified factitious illness</p> <p>300.60 Depersonalization disorder</p>                                                                                                                                                                                                                                                                                                                                                                                                                                                                                                                                                                                                                                                                                                         | <p>F44.5 Conversion disorder with seizures or convulsions</p> <p>F44.6 Conversion disorder with sensory symptom or deficit</p> <p>F44.7 Conversion disorder with mixed symptom presentation</p> <p>F44.81 Dissociative identity disorder</p> <p>F44.89 Other dissociative and conversion disorders</p> <p>F44.9 Dissociative and conversion disorder, unspecified</p> <p>F48.1 Depersonalization-derealization syndrome</p> |
| Adjustment Disorder | <p>308.00 Predominant disturbance of emotions</p> <p>308.20 Predominant psychomotor disturbance</p> <p>308.30 Other acute reactions to stress</p> <p>308.40 Mixed disorders as reaction to stress</p> <p>308.90 Unspecified acute reaction to stress</p> <p>309.00 Adjustment disorder with depressed mood</p> <p>309.10 Prolonged depressive reaction</p> <p>309.21 Separation anxiety disorder</p> <p>309.22 Emancipation disorder of adolescence and early adult life</p> <p>309.23 Specific academic or work inhibition</p> <p>309.24 Adjustment disorder with anxiety</p> <p>309.28 Adjustment disorder with mixed anxiety and depressed mood</p> <p>309.29 Other adjustment reactions with predominant disturbance of other emotions</p> <p>309.30 Adjustment disorder with disturbance of conduct</p> <p>309.40 Adjustment disorder with mixed disturbance of emotions and conduct</p> | <p>F43.2 Adjustment disorder</p> <p>F43.8 Other reactions to severe stress</p> <p>F43.9 Reaction to severe stress, unspecified</p>                                                                                                                                                                                                                                                                                          |

**eTable 2.** Associations Between Any Psychiatric Disorder and Breakthrough SARS-CoV-2 Infections Among Fully Vaccinated VA Patients at Least 30 Days Postvaccination (n = 241,705), in the Full Sample and Age-Stratified

|                              | Model 1          |         | Model 2          |         |
|------------------------------|------------------|---------|------------------|---------|
|                              | RR (95% CI)      | p-value | RR (95% CI)      | p-value |
| <i>Full Sample</i>           |                  |         |                  |         |
| Any Psychiatric Disorder     | 1.07 (1.05-1.09) | <.0001  | 1.03 (1.01-1.05) | <.0001  |
| <i>Age &lt;65 (n=89,436)</i> |                  |         |                  |         |
| Any Psychiatric Disorder     | 1.04 (1.00-1.07) | 0.024   | 1.00 (0.97-1.04) | 0.76    |
| <i>Age ≥65 (n=152,144)</i>   |                  |         |                  |         |
| Any Psychiatric Disorder     | 1.10 (1.08-1.13) | <.0001  | 1.05 (1.03-1.08) | <.0001  |

CI=confidence intervals. RR=relative risk. SARS-CoV-2=severe acute respiratory syndrome coronavirus 2. VA=U.S. Department of Veterans Affairs. Reference group for each model is No Psychiatric Disorders.

Model 1: age, age squared, sex, race, ethnicity, vaccine type, time since vaccination, and vaccine type\*time since vaccination.

Model 2: Model 1 plus obese status, diabetes, cardiovascular disease including hypertension, obstructive sleep apnea, chronic obstructive pulmonary disease, cancer, chronic kidney disease, liver disease, HIV, and smoking.

**eTable 3.** Associations Between Psychiatric Disorders and Breakthrough SARS-CoV-2 Infections Among Fully Vaccinated VA Patients Excluding Those With Booster Vaccination (n = 257,171), in the Full Sample and Age-Stratified

|                              | Model 1            |                | Model 2            |                |
|------------------------------|--------------------|----------------|--------------------|----------------|
|                              | <i>RR (95% CI)</i> | <i>p-value</i> | <i>RR (95% CI)</i> | <i>p-value</i> |
| <i>Full Sample</i>           |                    |                |                    |                |
| Any Psychiatric Disorder     | 1.07 (1.05-1.09)   | <.0001         | 1.03 (1.01-1.05)   | 0.002          |
|                              |                    |                |                    |                |
| <i>Age &lt;65 (n=96,406)</i> |                    |                |                    |                |
| Any Psychiatric Disorder     | 1.03 (1.00-1.06)   | 0.045          | 1.00 (0.97-1.04)   | 0.93           |
|                              |                    |                |                    |                |
| <i>Age ≥65 (n=165,765)</i>   |                    |                |                    |                |
| Any Psychiatric Disorder     | 1.10 (1.07-1.13)   | <.0001         | 1.05 (1.03-1.08)   | <.0001         |

CI=confidence intervals. RR=relative risk. SARS-CoV-2=severe acute respiratory syndrome coronavirus 2. VA=U.S. Department of Veterans Affairs. Reference group for each model is No Psychiatric Disorders.  
 Model 1: age, age squared, sex, race, ethnicity, vaccine type, time since vaccination, and vaccine type\*time since vaccination.  
 Model 2: Model 1 plus obese status, diabetes, cardiovascular disease including hypertension, obstructive sleep apnea, chronic obstructive pulmonary disease, cancer, chronic kidney disease, liver disease, HIV, and smoking.
